# Supplementary material for: Circulating proteomic signature of early death in heart failure patients with reduced ejection fraction
Source: PubMed Central journal article supplement (PMC6914779; doi:10.1038/s41598-019-55727-1), 2019-12-16
Supplement: 41598_2019_55727_MOESM1_ESM.pdf [file 41598_2019_55727_MOESM1_ESM.pdf]

**SUPPLEMENTARY DATA**

**Circulating proteomic signature of early death in heart failure patients with reduced ejection fraction**

**Marie Cuvelliez<sup>1,2\*</sup>, Vincent Vandewalle<sup>3,4\*</sup>, Maxime Brunin<sup>4</sup>, Olivia Beseme<sup>1,2</sup>, Audrey Hulot<sup>4</sup>,  
Pascal de Groot<sup>1,3,5</sup>, Philippe Amouyel<sup>1,2,6</sup>, Christophe Bauters<sup>1,2,6#</sup>, Guillemette Marot<sup>3,4#</sup>,  
Florence Pinet<sup>1,2#‡</sup>**

-----

**SUPPLEMENTARY FIGURES**

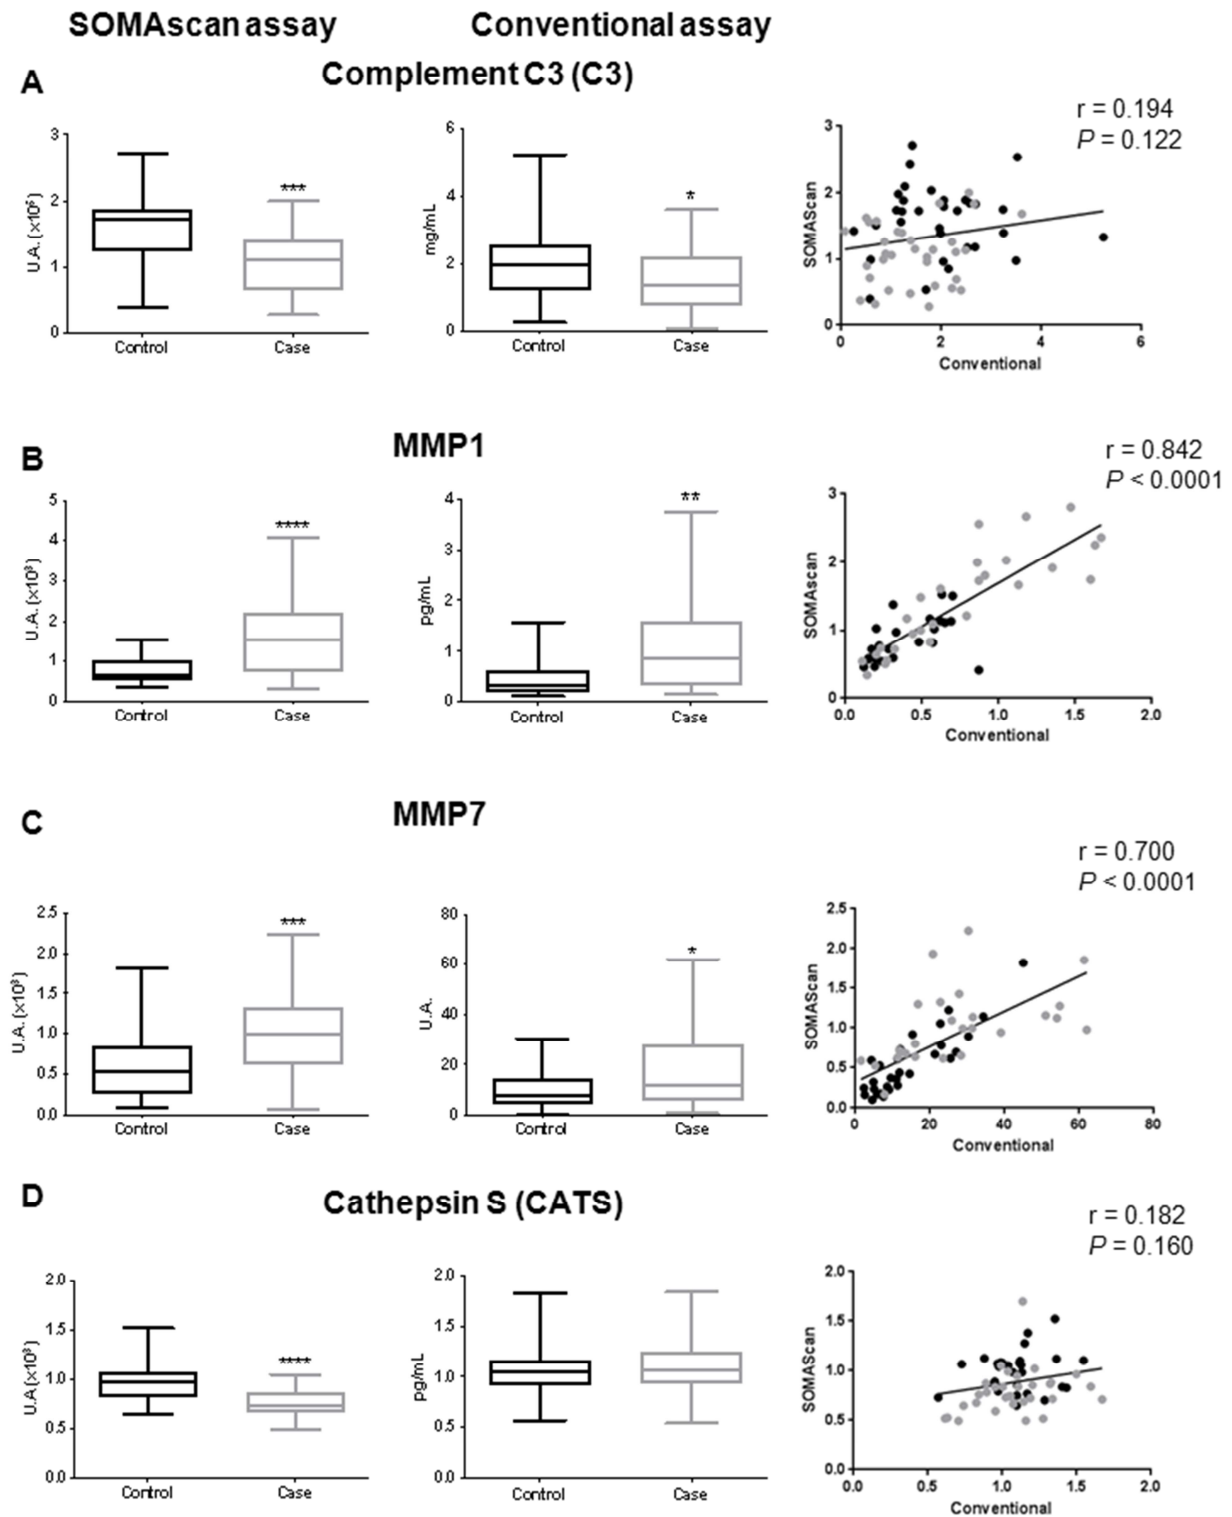

**Supplementary Figure S1 online. Correlation for the 4 selected proteins quantified by Somascan and conventional assays. Quantification of complement C3 (a), MMP1 (b), MMP7 (c) and cathepsin S**

(d) by SOMAScan assay (left panels) and conventional assays (middle panels) were performed in the same patients (33 who died of CV causes and 33 alive after 3 years) of the INCA study (Table 1). Data are expressed in arbitrary units (A.U) corresponding to relative fluorescent units (RFU) for the SOMAScan assay and to concentration for the conventional assays, except for MMP7. Data are presented as box-and-whisker plots showing median (line) and min to max (whisker). Statistical significance was determined by the Wilcoxon-Mann-Whitney test. \* $P < 0.05$ , \*\* $P < 0.01$ , \*\*\* $P < 0.001$ , \*\*\*\* $P < 0.0001$ . The 4 proteins quantified by SOMAScan and conventional assays were tested for correlation (right panels). Data are presented as individual value for each patient in the two groups, with Case (patients who died after 3 years of follow-up) in grey colour and Control (patients alive after 3 years of follow-up) in black colour. The Spearman's rank correlation coefficient ( $r$ ) and the  $P$  value are indicated on the graph.

```

P25774|CATS_HUMAN   MKRLVCVLLVCSSAVAQLHKDPTLDHHWHLWKKTYGKQYKEKNEEAVRRLIWEKNLKFVM 60
P25774-2|CATS_HUMAN MKRLVCVLLVCSSAVAQLHKDPTLDHHWHLWKKTYGKQYKEKNEEAVRRLIWEKNLKFVM 60
*****

P25774|CATS_HUMAN   LHNLEHSMGMHSYDLGMNHLGDMTSEEVMSLMS SLRVPSQWQRNI TYKSNPNRI LPDSVD 120
P25774-2|CATS_HUMAN LHNLEHSMGMHSYDLGMNHLGDM----- 83
*****

P25774|CATS_HUMAN   WREKGCVTEVKYQGSCGACWAFSAVGALEAQLKLTGKLVSLSAQNLVDCSTEKYGNKGC 180
P25774-2|CATS_HUMAN -----GSCGACWAFSAVGALEAQLKLTGKLVSLSAQNLVDCSTEKYGNKGC 130
*****

P25774|CATS_HUMAN   NGGFMTTAFQYIIDNKGIDSDASYPYKAMDQKCQYDSKYRAATCSKYTELPYGREDVLKE 240
P25774-2|CATS_HUMAN NGGFMTTAFQYIIDNKGIDSDASYPYKAMDQKCQYDSKYRAATCSKYTELPYGREDVLKE 190
*****

P25774|CATS_HUMAN   AVANKGPVSVGVDARHPSFFLYRSGVYYEPSCTQNVNHGVLVVGYGDLNGKEYWLVKNSW 300
P25774-2|CATS_HUMAN AVANKGPVSVGVDARHPSFFLYRSGVYYEPSCTQNVNHGVLVVGYGDLNGKEYWLVKNSW 250
*****

P25774|CATS_HUMAN   GHNFGEEGYIRMARNKGNHCGIASFPSYPEI 331
P25774-2|CATS_HUMAN GHNFGEEGYIRMARNKGNHCGIASFPSYPEI 281
*****

```

**Supplementary Figure S2 online. Sequence alignment of the 2 human isoforms of Cathepsin S (CATS).** The alignment was performed with the Align tool from UniProtKB database (<https://www.uniprot.org/align/>) and showed the 50 AA (from 184 to 133) highlighted in grey which are deleted in the isoform 2. The identity between the 2 isoforms is 84.894%.

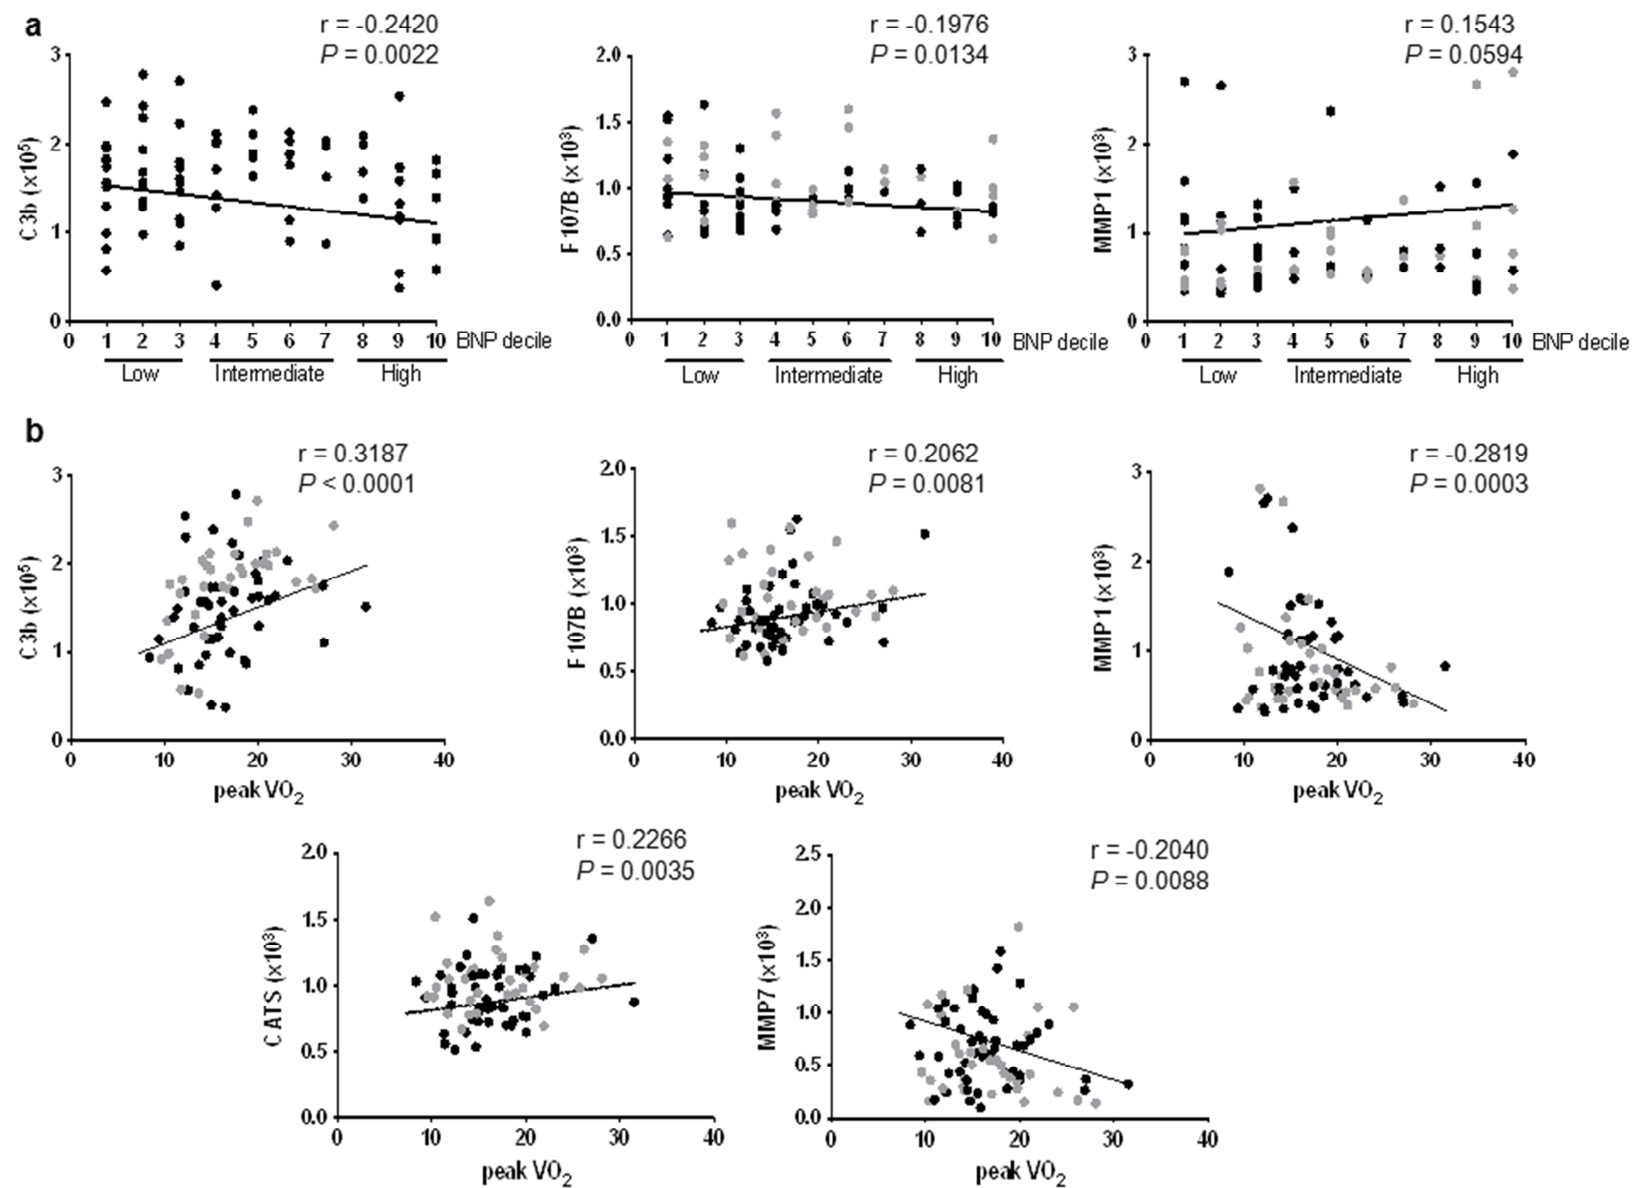

**Supplementary Figure S3 online. Correlation of BNP and peak VO<sub>2</sub> values with the 6 protein candidates.** Only the statistically significant correlations are shown. **a:** Correlation of BNP with C3b (left panel), F107B (middle panel) and MMP1 (right panel). The BNP level quantified at the hospital was categorized as low (deciles 1, 2 and 3), intermediate (deciles 4, 5, 6 and 7) or high (deciles 8, 9 and 10) for each individual patient. **b:** Correlation of peak VO<sub>2</sub> with C3b (top left panel), F107B (top middle panel), MMP1 (top right panel), CATS (bottom left panel) and MMP7 (bottom right panel). Data are presented as individual value for each patient in the two groups, with Case (patients who died after 3 years of follow-up) in grey colour and Control (patients alive after 3 years of follow-up) in black colour. The Spearman's rank correlation coefficient ( $r$ ) and the  $P$  value were calculated and indicated on the graph.

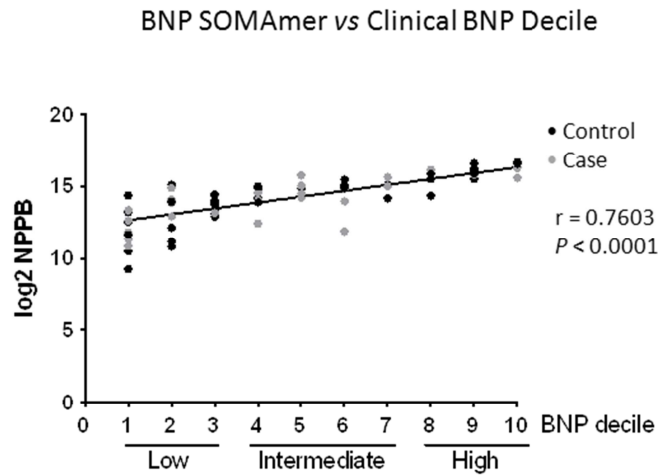

**Supplementary Figure S4 online. Correlation of BNP values in INCA population.** BNP was quantified in the plasma of HF patients respectively, at the hospital and by SOMAscan assay. The BNP level quantified at the hospital was categorized as low (deciles 1, 2 and 3), intermediate (deciles 4, 5, 6 and 7) or high (deciles 8, 9 and 10) for each individual patient. Data of the BNP quantified by SOMAscan were log<sub>2</sub> transformed. Data are presented as individual value for each patient in the two groups, with Case (patients who died after 3 years of follow-up) in grey colour and Control (patients alive after 3 years of follow-up) in black colour. The Spearman's rank correlation coefficient ( $r$ ) and the  $P$  value were calculated and indicated on the graph.

**Supplementary Table S1 online. List of the 203 proteins differentially expressed between the patients who died (Case, n=84) and the patients alive (Control, n=80) after 3 years follow-up.**

| Protein symbol | Protein name                                                           | UniProt ID* | mean Control | mean Case | SD Control | SD Case | log2 ratio | M-W p-value | M-W adjusted p-value |
|----------------|------------------------------------------------------------------------|-------------|--------------|-----------|------------|---------|------------|-------------|----------------------|
| RAN            | GTP-binding nuclear protein Ran                                        | P62826      | 9.212        | 10.495    | 1.860      | 1.757   | -1.283     | 0.00001     | 0.00055              |
| SRCN1          | Proto-oncogene tyrosine-protein kinase Src                             | P12931      | 11.895       | 13.078    | 1.827      | 2.094   | -1.183     | 0.00010     | 0.00213              |
| PAK6           | Serine/threonine-protein kinase PAK 6                                  | Q9NQU5      | 11.617       | 12.639    | 1.497      | 1.667   | -1.022     | 0.00006     | 0.00168              |
| BTK            | Tyrosine-protein kinase BTK                                            | Q06187      | 11.077       | 12.004    | 1.569      | 1.794   | -0.927     | 0.00046     | 0.00452              |
| IF4G2          | Eukaryotic translation initiation factor 4 gamma 2                     | P78344      | 10.103       | 11.028    | 1.518      | 1.466   | -0.925     | 0.00020     | 0.00291              |
| PKC-A          | Protein kinase C alpha type                                            | P17252      | 12.699       | 13.597    | 1.606      | 1.647   | -0.897     | 0.00062     | 0.00541              |
| PF-4           | Platelet factor 4                                                      | P02776      | 14.852       | 15.730    | 1.615      | 1.655   | -0.878     | 0.00019     | 0.00291              |
| Tropomyosin 4  | Tropomyosin alpha-4 chain                                              | P67936      | 13.897       | 14.770    | 1.762      | 1.653   | -0.873     | 0.00148     | 0.00961              |
| SGTA           | Small glutamine-rich tetratricopeptide repeat-containing protein alpha | O43765      | 10.850       | 11.702    | 0.951      | 1.043   | -0.853     | 0.00000     | 0.00007              |
| Cyclophilin F  | Peptidyl-prolyl cis-trans isomerase F, mitochondrial                   | P30405      | 12.859       | 13.707    | 1.903      | 1.751   | -0.848     | 0.00514     | 0.02209              |
| Alpha enolase  | Alpha-enolase                                                          | P06733      | 12.684       | 13.521    | 2.168      | 1.893   | -0.836     | 0.00967     | 0.03609              |



|                       |                                                     |                  |        |        |       |       |        |         |         |
|-----------------------|-----------------------------------------------------|------------------|--------|--------|-------|-------|--------|---------|---------|
| CSK                   | Tyrosine-protein kinase CSK                         | P41240           | 11.236 | 12.066 | 1.604 | 1.753 | -0.830 | 0.00169 | 0.01029 |
| NCC27                 | Chloride intracellular channel protein 1            | O00299           | 10.912 | 11.735 | 1.160 | 1.500 | -0.823 | 0.00043 | 0.00426 |
| GSK-3 alpha/beta      | Glycogen synthase kinase-3 alpha/beta               | P49840<br>P49841 | 11.681 | 12.477 | 1.265 | 1.358 | -0.797 | 0.00015 | 0.00262 |
| M2-PK                 | Pyruvate kinase PKM                                 | P14618           | 11.369 | 12.151 | 1.476 | 1.620 | -0.782 | 0.00166 | 0.01021 |
| RANTES                | C-C motif chemokine 5                               | P13501           | 14.097 | 14.875 | 1.323 | 1.164 | -0.778 | 0.00011 | 0.00216 |
| PPID                  | Peptidyl-prolyl cis-trans isomerase D               | Q08752           | 10.367 | 11.145 | 1.658 | 1.785 | -0.778 | 0.00377 | 0.01810 |
| MMP-1                 | Interstitial collagenase                            | P03956           | 9.612  | 10.386 | 0.803 | 0.897 | -0.773 | 0.00000 | 0.00005 |
| eIF-4H                | Eukaryotic translation initiation factor 4H         | Q15056           | 12.315 | 13.079 | 1.554 | 1.317 | -0.764 | 0.00141 | 0.00937 |
| RAC1                  | Ras-related C3 botulinum toxin substrate 1          | P63000           | 13.493 | 14.245 | 1.286 | 1.263 | -0.753 | 0.00019 | 0.00291 |
| Carbonic anhydrase 13 | Carbonic anhydrase 13                               | Q8N1Q1           | 9.804  | 10.556 | 1.233 | 1.393 | -0.752 | 0.00049 | 0.00463 |
| PKC-B-II              | Protein kinase C beta type (splice variant beta-II) | P05771           | 10.308 | 11.047 | 1.618 | 1.720 | -0.738 | 0.00536 | 0.02293 |
| Sorting nexin 4       | Sorting nexin-4                                     | O95219           | 11.824 | 12.561 | 1.153 | 1.207 | -0.737 | 0.00014 | 0.00255 |
| RAC3                  | Ras-related C3 botulinum toxin substrate 3          | P60763           | 11.530 | 12.260 | 0.885 | 1.060 | -0.730 | 0.00001 | 0.00055 |
| IMB1                  | Importin subunit beta-1                             | Q14974           | 12.342 | 13.061 | 1.131 | 1.048 | -0.719 | 0.00002 | 0.00074 |

|                                 |                                           |        |        |        |       |       |        |         |         |
|---------------------------------|-------------------------------------------|--------|--------|--------|-------|-------|--------|---------|---------|
| NAP-2                           | Neutrophil-activating peptide 2           | P02775 | 12.313 | 13.018 | 1.255 | 1.266 | -0.705 | 0.00020 | 0.00291 |
| Sphingosine kinase 1            | Sphingosine kinase 1                      | Q9NYA1 | 10.629 | 11.327 | 1.236 | 1.399 | -0.697 | 0.00139 | 0.00931 |
| Histone H1.2                    | Histone H1.2                              | P16403 | 8.630  | 9.326  | 1.233 | 1.407 | -0.696 | 0.00083 | 0.00656 |
| CTAP-III                        | Connective tissue-activating peptide III  | P02775 | 13.631 | 14.321 | 1.248 | 1.242 | -0.690 | 0.00024 | 0.00323 |
| SBDS                            | Ribosome maturation protein SBDS          | Q9Y3A5 | 11.294 | 11.974 | 0.961 | 1.148 | -0.679 | 0.00011 | 0.00213 |
| Olfactomedin-4                  | Olfactomedin-4                            | Q6UX06 | 8.154  | 8.832  | 1.009 | 1.802 | -0.678 | 0.00014 | 0.00248 |
| Thrombospondin-1                | Thrombospondin-1                          | P07996 | 11.542 | 12.219 | 1.264 | 1.233 | -0.677 | 0.00074 | 0.00615 |
| PPIE                            | Peptidyl-prolyl cis-trans isomerase E     | Q9UNP9 | 9.580  | 10.252 | 0.840 | 0.954 | -0.672 | 0.00001 | 0.00055 |
| LYN                             | Tyrosine-protein kinase Lyn               | P07948 | 10.716 | 11.387 | 1.403 | 1.396 | -0.671 | 0.00228 | 0.01260 |
| XPNPEP1                         | Xaa-Pro aminopeptidase 1                  | Q9NQW7 | 13.150 | 13.808 | 1.006 | 1.003 | -0.658 | 0.00005 | 0.00161 |
| NDP kinase B                    | Nucleoside diphosphate kinase B           | P22392 | 12.991 | 13.647 | 1.223 | 1.264 | -0.656 | 0.00049 | 0.00463 |
| Aflatoxin B1 aldehyde reductase | Aflatoxin B1 aldehyde reductase member 2  | O43488 | 9.313  | 9.967  | 1.293 | 1.424 | -0.654 | 0.00364 | 0.01771 |
| SP-D                            | Pulmonary surfactant-associated protein D | P35247 | 13.446 | 14.099 | 1.774 | 1.746 | -0.653 | 0.00494 | 0.02156 |
| Flt-3                           | Receptor-type tyrosine-protein            | P36888 | 10.426 | 11.076 | 0.931 | 1.113 | -0.651 | 0.00012 | 0.00227 |

|            |                                                       |                                                        |        |        |       |       |        |         |         |
|------------|-------------------------------------------------------|--------------------------------------------------------|--------|--------|-------|-------|--------|---------|---------|
|            | kinase FLT3                                           |                                                        |        |        |       |       |        |         |         |
| PRKACA     | cAMP-dependent protein kinase catalytic subunit alpha | P17612                                                 | 12.374 | 13.017 | 1.504 | 1.349 | -0.643 | 0.00716 | 0.02833 |
| 37694      | 14-3-3 protein family                                 | P31946, P62258, P61981, Q04917, P27348, P63104, P31947 | 10.561 | 11.197 | 1.130 | 1.233 | -0.637 | 0.00085 | 0.00663 |
| LYNB       | Tyrosine-protein kinase Lyn, isoform B                | P07948                                                 | 12.992 | 13.618 | 1.407 | 1.344 | -0.626 | 0.00446 | 0.02026 |
| BARK1      | beta-adrenergic receptor kinase 1                     | P25098                                                 | 11.949 | 12.570 | 1.394 | 1.332 | -0.621 | 0.00332 | 0.01637 |
| CK2-A1:B   | Casein kinase II 2-alpha:2-beta heterotetramer        | P68400 P67870                                          | 12.653 | 13.273 | 1.067 | 0.917 | -0.620 | 0.00008 | 0.00196 |
| MMP-7      | Matrilysin                                            | P09237                                                 | 9.044  | 9.664  | 0.926 | 0.962 | -0.620 | 0.00003 | 0.00112 |
| GPVI       | Platelet glycoprotein VI                              | Q9HCN6                                                 | 12.357 | 12.960 | 0.878 | 0.949 | -0.604 | 0.00010 | 0.00210 |
| Esterase D | S-formylglutathione hydrolase                         | P10768                                                 | 12.133 | 12.720 | 0.897 | 0.900 | -0.588 | 0.00002 | 0.00072 |
| PA2G4      | Proliferation-associated protein 2G4                  | Q9UQ80                                                 | 9.937  | 10.523 | 1.100 | 1.202 | -0.586 | 0.00057 | 0.00510 |
| HSP 90a/b  | Heat shock protein HSP 90-alpha/beta                  | P07900 P08238                                          | 12.478 | 13.062 | 0.876 | 0.967 | -0.584 | 0.00007 | 0.00185 |
| TCTP       | Translationally-controlled tumor protein              | P13693                                                 | 12.542 | 13.112 | 1.028 | 1.065 | -0.570 | 0.00075 | 0.00619 |
| PPAC       | Low molecular                                         | P24666                                                 | 10.891 | 11.459 | 1.047 | 1.143 | -0.568 | 0.00200 | 0.01155 |

|                                             |                                                     |                  |        |        |       |       |        |         |         |
|---------------------------------------------|-----------------------------------------------------|------------------|--------|--------|-------|-------|--------|---------|---------|
|                                             | weight<br>phosphotyrosine<br>protein<br>phosphatase |                  |        |        |       |       |        |         |         |
| SNAA                                        | Alpha-soluble<br>NSF attachment<br>protein          | P54920           | 11.868 | 12.432 | 0.911 | 1.004 | -0.564 | 0.00030 | 0.00363 |
| 41                                          | Protein 4.1                                         | P11171           | 13.562 | 14.125 | 1.081 | 0.936 | -0.564 | 0.00026 | 0.00339 |
| SMAD2                                       | Mothers against<br>decapentaplegic<br>homolog 2     | Q15796           | 11.375 | 11.937 | 1.075 | 1.126 | -0.563 | 0.00187 | 0.01110 |
| Caspase-3                                   | Caspase-3                                           | P42574           | 12.016 | 12.572 | 1.191 | 1.084 | -0.556 | 0.00113 | 0.00811 |
| Myokinase,<br>human                         | Adenylate kinase<br>isoenzyme 1                     | P00568           | 13.448 | 14.002 | 1.086 | 1.055 | -0.553 | 0.00002 | 0.00081 |
| CPNE1                                       | Copine-1                                            | Q99829           | 10.170 | 10.716 | 1.445 | 1.421 | -0.547 | 0.00995 | 0.03662 |
| Calpain I                                   | Calpain I                                           | P07384<br>P04632 | 14.327 | 14.862 | 0.863 | 0.976 | -0.534 | 0.00022 | 0.00310 |
| GCP-2                                       | C-X-C motif<br>chemokine 6                          | P80162           | 9.528  | 10.057 | 0.709 | 0.681 | -0.529 | 0.00001 | 0.00055 |
| PLPP                                        | Pyridoxal<br>phosphate<br>phosphatase               | Q96GD0           | 11.038 | 11.567 | 0.855 | 0.808 | -0.529 | 0.00009 | 0.00209 |
| AMPM2                                       | Methionine<br>aminopeptidase 2                      | P50579           | 10.769 | 11.297 | 0.903 | 1.046 | -0.528 | 0.00070 | 0.00594 |
| CHIP                                        | E3 ubiquitin-<br>protein ligase<br>CHIP             | Q9UNE7           | 10.807 | 11.320 | 0.878 | 0.918 | -0.513 | 0.00020 | 0.00294 |
| CRK                                         | Adapter molecule<br>crk                             | P46108           | 12.564 | 13.067 | 0.766 | 0.624 | -0.503 | 0.00001 | 0.00055 |
| NSF1C                                       | NSFL1 cofactor<br>p47                               | Q9UNZ2           | 8.868  | 9.370  | 0.864 | 0.637 | -0.502 | 0.00002 | 0.00081 |
| Stress-<br>induced-<br>phosphoprote<br>in 1 | Stress-induced-<br>phosphoprotein 1                 | P31948           | 11.925 | 12.426 | 0.854 | 0.922 | -0.502 | 0.00058 | 0.00519 |

|                           |                                                               |        |        |        |       |       |        |         |         |
|---------------------------|---------------------------------------------------------------|--------|--------|--------|-------|-------|--------|---------|---------|
| RPS6KA3                   | Ribosomal protein S6 kinase alpha-3                           | P51812 | 9.363  | 9.864  | 1.013 | 0.917 | -0.501 | 0.00036 | 0.00401 |
| AREG                      | Amphiregulin                                                  | P15514 | 10.698 | 11.198 | 0.853 | 0.813 | -0.499 | 0.00015 | 0.00262 |
| STAT1                     | Signal transducer and activator of transcription 1-alpha/beta | P42224 | 11.919 | 12.414 | 1.191 | 1.042 | -0.495 | 0.00381 | 0.01819 |
| IL-2 sRg                  | Cytokine receptor common subunit gamma                        | P31785 | 10.676 | 11.170 | 0.787 | 0.772 | -0.494 | 0.00007 | 0.00189 |
| FER                       | Tyrosine-protein kinase Fer                                   | P16591 | 7.513  | 8.005  | 1.110 | 1.127 | -0.493 | 0.00371 | 0.01788 |
| 14-3-3 protein beta/alpha | 14-3-3 protein beta/alpha                                     | P31946 | 13.918 | 14.410 | 1.164 | 1.124 | -0.492 | 0.00709 | 0.02814 |
| VAV                       | Proto-oncogene vav                                            | P15498 | 10.861 | 11.349 | 1.409 | 1.375 | -0.488 | 0.01014 | 0.03701 |
| 14-3-3 protein zeta/delta | 14-3-3 protein zeta/delta                                     | P63104 | 16.122 | 16.609 | 1.049 | 0.948 | -0.487 | 0.00309 | 0.01548 |
| DRG-1                     | Vacuolar protein sorting-associated protein VTA1 homolog      | Q9NP79 | 13.659 | 14.143 | 1.092 | 1.070 | -0.484 | 0.00233 | 0.01271 |
| HSP 60                    | 60 kDa heat shock protein, mitochondrial                      | P10809 | 12.233 | 12.717 | 0.900 | 0.956 | -0.484 | 0.00059 | 0.00522 |
| NSE                       | Gamma-enolase                                                 | P09104 | 14.496 | 14.973 | 0.750 | 0.677 | -0.476 | 0.00001 | 0.00055 |
| STAT3                     | Signal transducer and activator of transcription 3            | P40763 | 9.236  | 9.713  | 1.046 | 1.081 | -0.476 | 0.00247 | 0.01307 |
| SARP-2                    | Secreted frizzled-related protein 1                           | Q8N474 | 11.555 | 12.030 | 1.111 | 1.271 | -0.475 | 0.00569 | 0.02374 |
| BAD                       | Bcl2-associated agonist of cell                               | Q92934 | 12.313 | 12.785 | 0.856 | 0.856 | -0.472 | 0.00070 | 0.00594 |

| death                     |                                          |                  |        |        |       |       |        |         |         |
|---------------------------|------------------------------------------|------------------|--------|--------|-------|-------|--------|---------|---------|
| Peroxiredoxin-6           | Peroxiredoxin-6                          | P30041           | 8.381  | 8.850  | 0.810 | 0.959 | -0.469 | 0.00095 | 0.00708 |
| IMDH1                     | Inosine-5'-monophosphate dehydrogenase 1 | P20839           | 11.029 | 11.482 | 1.421 | 1.198 | -0.452 | 0.00037 | 0.00403 |
| FGF-16                    | Fibroblast growth factor 16              | O43320           | 10.324 | 10.775 | 0.745 | 0.719 | -0.451 | 0.00009 | 0.00203 |
| Gro-b/g                   | Gro-beta/gamma                           | P19876<br>P19875 | 8.111  | 8.559  | 0.737 | 0.705 | -0.448 | 0.00009 | 0.00209 |
| DEAD-box protein 19B      | ATP-dependent RNA helicase DDX19B        | Q9UMR2           | 11.122 | 11.567 | 0.939 | 0.943 | -0.445 | 0.00243 | 0.01296 |
| amyloid precursor protein | Amyloid beta A4 protein                  | P05067           | 14.858 | 15.301 | 0.878 | 0.890 | -0.443 | 0.00121 | 0.00837 |
| HSP 90b                   | Heat shock protein HSP 90-beta           | P08238           | 14.684 | 15.121 | 0.698 | 0.716 | -0.437 | 0.00009 | 0.00209 |
| Tpo                       | Thrombopoietin                           | P40225           | 7.462  | 7.898  | 0.676 | 0.796 | -0.436 | 0.00012 | 0.00239 |
| METAP1                    | Methionine aminopeptidase 1              | P53582           | 8.630  | 9.060  | 0.909 | 0.965 | -0.430 | 0.00360 | 0.01765 |
| MAPK2                     | MAP kinase-activated protein kinase 2    | P49137           | 10.521 | 10.950 | 1.084 | 1.057 | -0.429 | 0.00486 | 0.02156 |
| YES                       | Tyrosine-protein kinase Yes              | P07947           | 9.347  | 9.775  | 0.528 | 0.703 | -0.428 | 0.00001 | 0.00064 |
| I-TAC                     | C-X-C motif chemokine 11                 | O14625           | 11.775 | 12.202 | 0.680 | 1.050 | -0.427 | 0.00389 | 0.01834 |
| HMG-1                     | High mobility group protein B1           | P09429           | 11.940 | 12.353 | 1.257 | 1.139 | -0.412 | 0.00494 | 0.02156 |
| UBE2N                     | Ubiquitin-conjugating enzyme E2 N        | P61088           | 12.084 | 12.494 | 0.947 | 0.928 | -0.410 | 0.00489 | 0.02156 |
| Midkine                   | Midkine                                  | P21741           | 13.325 | 13.734 | 1.145 | 0.912 | -0.409 | 0.00024 | 0.00325 |

|                           |                                               |        |        |        |       |       |        |         |         |
|---------------------------|-----------------------------------------------|--------|--------|--------|-------|-------|--------|---------|---------|
| Triosephosphate isomerase | Triosephosphate isomerase                     | P60174 | 12.199 | 12.608 | 0.936 | 0.919 | -0.409 | 0.00450 | 0.02040 |
| NMT1                      | Glycylpeptide N-tetradecanoyltransferase 1    | P30419 | 10.897 | 11.302 | 0.847 | 0.948 | -0.405 | 0.00752 | 0.02958 |
| EF-1-beta                 | Elongation factor 1-beta                      | P24534 | 9.079  | 9.483  | 0.545 | 0.694 | -0.404 | 0.00006 | 0.00174 |
| PDE5A                     | cGMP-specific 3',5'-cyclic phosphodiesterase  | O76074 | 11.521 | 11.917 | 0.881 | 0.943 | -0.396 | 0.00514 | 0.02209 |
| Adiponectin               | Adiponectin                                   | Q15848 | 10.830 | 11.223 | 0.763 | 0.793 | -0.393 | 0.00283 | 0.01455 |
| PDGF-AA                   | Platelet-derived growth factor subunit A      | P04085 | 13.298 | 13.684 | 0.953 | 0.966 | -0.386 | 0.00151 | 0.00969 |
| LDH-H 1                   | L-lactate dehydrogenase B chain               | P07195 | 9.564  | 9.947  | 0.513 | 0.543 | -0.383 | 0.00001 | 0.00055 |
| eIF-5A-1                  | Eukaryotic translation initiation factor 5A-1 | P63241 | 14.515 | 14.897 | 0.777 | 0.708 | -0.383 | 0.00123 | 0.00843 |
| FGF-8A                    | Fibroblast growth factor 8 isoform A          | P55075 | 8.044  | 8.423  | 0.626 | 0.646 | -0.378 | 0.00018 | 0.00291 |
| UB2L3                     | Ubiquitin-conjugating enzyme E2 L3            | P68036 | 10.032 | 10.403 | 0.866 | 0.750 | -0.371 | 0.00090 | 0.00679 |
| Peroxiredoxin-1           | Peroxiredoxin-1                               | Q06830 | 10.873 | 11.243 | 0.705 | 0.650 | -0.370 | 0.00036 | 0.00400 |
| JAM-C                     | Junctional adhesion molecule C                | Q9BX67 | 11.602 | 11.971 | 0.538 | 0.573 | -0.369 | 0.00002 | 0.00075 |
| FGF-6                     | Fibroblast growth factor 6                    | P10767 | 8.190  | 8.554  | 0.516 | 0.638 | -0.365 | 0.00020 | 0.00291 |
| ERAB                      | 3-hydroxyacyl-                                | Q99714 | 9.721  | 10.085 | 0.593 | 0.728 | -0.365 | 0.00030 | 0.00363 |

|                     |                                                                   |        |        |        |       |       |        |         |         |
|---------------------|-------------------------------------------------------------------|--------|--------|--------|-------|-------|--------|---------|---------|
|                     | CoA<br>dehydrogenase<br>type-2                                    |        |        |        |       |       |        |         |         |
| DKK1                | Dickkopf-related<br>protein 1                                     | O94907 | 14.436 | 14.798 | 0.823 | 0.875 | -0.362 | 0.00181 | 0.01086 |
| MK08                | Mitogen-<br>activated protein<br>kinase 8                         | P45983 | 9.334  | 9.694  | 0.979 | 0.878 | -0.360 | 0.00611 | 0.02516 |
| $\alpha$ -Synuclein | Alpha-synuclein                                                   | P37840 | 12.612 | 12.972 | 0.864 | 0.915 | -0.360 | 0.00086 | 0.00663 |
| MAPK14              | Mitogen-<br>activated protein<br>kinase 14                        | Q16539 | 10.175 | 10.532 | 0.840 | 0.915 | -0.356 | 0.01005 | 0.03686 |
| PPase               | Inorganic<br>pyrophosphatase                                      | Q15181 | 14.197 | 14.552 | 0.683 | 0.640 | -0.354 | 0.00136 | 0.00924 |
| NACA                | Nascent<br>polypeptide-<br>associated<br>complex subunit<br>alpha | Q13765 | 12.416 | 12.768 | 0.576 | 0.523 | -0.352 | 0.00001 | 0.00055 |
| SMAD3               | Mothers against<br>decapentaplegic<br>homolog 3                   | P84022 | 12.452 | 12.798 | 0.777 | 0.813 | -0.346 | 0.00202 | 0.01155 |
| CaMKK<br>alpha      | Calcium/calmodu<br>lin-dependent<br>protein kinase<br>kinase 1    | Q8N5S9 | 7.988  | 8.331  | 0.595 | 0.645 | -0.343 | 0.00052 | 0.00482 |
| RS3A                | 40S ribosomal<br>protein S3a                                      | P61247 | 8.911  | 9.253  | 0.739 | 0.710 | -0.341 | 0.00007 | 0.00190 |
| PSA6                | Proteasome<br>subunit alpha<br>type-6                             | P60900 | 9.296  | 9.636  | 0.554 | 0.539 | -0.340 | 0.00006 | 0.00168 |
| Transketolas<br>e   | Transketolase                                                     | P29401 | 15.026 | 15.363 | 0.835 | 0.797 | -0.336 | 0.00913 | 0.03457 |
| KREM2               | Kremen protein 2                                                  | Q8NCW0 | 10.778 | 11.113 | 0.657 | 0.601 | -0.334 | 0.00095 | 0.00708 |
| PDGF-BB             | Platelet-derived<br>growth factor                                 | P01127 | 14.784 | 15.119 | 1.155 | 1.141 | -0.334 | 0.01368 | 0.04653 |



| subunit B                           |                                                  |                            |        |        |       |       |        |         |         |
|-------------------------------------|--------------------------------------------------|----------------------------|--------|--------|-------|-------|--------|---------|---------|
| SSRP1                               | FACT complex subunit SSRP1                       | Q08945                     | 8.732  | 9.064  | 1.109 | 0.900 | -0.333 | 0.00066 | 0.00570 |
| UCRP                                | Ubiquitin-like protein ISG15                     | P05161                     | 10.930 | 11.259 | 0.678 | 0.671 | -0.329 | 0.00161 | 0.01006 |
| HEMK2                               | HemK methyltransferase family member 2           | Q9Y5N5                     | 10.797 | 11.125 | 0.652 | 0.750 | -0.328 | 0.00189 | 0.01110 |
| Cathepsin A                         | Lysosomal protective protein                     | P10619                     | 12.527 | 12.849 | 0.677 | 0.636 | -0.322 | 0.00202 | 0.01155 |
| RBM39                               | RNA-binding protein 39                           | Q14498                     | 9.025  | 9.345  | 1.022 | 0.987 | -0.321 | 0.00042 | 0.00419 |
| SE6L2                               | Seizure 6-like protein 2                         | Q6UXD5                     | 10.314 | 10.634 | 0.764 | 0.642 | -0.320 | 0.00045 | 0.00438 |
| BCL2-like 1 protein                 | Bcl-2-like protein 1                             | Q07817                     | 9.435  | 9.749  | 0.589 | 0.686 | -0.314 | 0.00299 | 0.01511 |
| IL-3 Ra                             | Interleukin-3 receptor subunit alpha             | P26951                     | 9.584  | 9.897  | 0.686 | 0.663 | -0.314 | 0.00071 | 0.00601 |
| RS7                                 | 40S ribosomal protein S7                         | P62081                     | 10.356 | 10.668 | 1.322 | 1.042 | -0.312 | 0.00150 | 0.00968 |
| AMPK a2b2g1                         | AMP Kinase (alpha2beta2gamma1)                   | P54646<br>O43741<br>P54619 | 10.751 | 11.061 | 0.945 | 0.804 | -0.311 | 0.01190 | 0.04180 |
| DHH                                 | Desert hedgehog protein N-product                | O43323                     | 9.269  | 9.576  | 0.489 | 0.519 | -0.307 | 0.00008 | 0.00201 |
| Rab GDP dissociation inhibitor beta | Rab GDP dissociation inhibitor beta              | P50395                     | 13.627 | 13.933 | 0.737 | 0.661 | -0.306 | 0.00213 | 0.01191 |
| ING1                                | Inhibitor of growth protein 1                    | Q9UK53                     | 13.101 | 13.405 | 0.881 | 0.872 | -0.304 | 0.01485 | 0.04975 |
| ARI3A                               | AT-rich interactive domain-containing protein 3A | Q99856                     | 8.615  | 8.917  | 0.854 | 0.828 | -0.302 | 0.00110 | 0.00801 |

|                                         |                                                                 |                  |        |        |       |       |        |         |         |
|-----------------------------------------|-----------------------------------------------------------------|------------------|--------|--------|-------|-------|--------|---------|---------|
| KPCI                                    | Protein kinase C<br>iota type                                   | P41743           | 9.746  | 10.047 | 0.672 | 0.652 | -0.300 | 0.00120 | 0.00837 |
| Ubiquitin                               | Ubiquitin                                                       | P62979           | 10.153 | 10.452 | 0.581 | 0.818 | -0.298 | 0.00387 | 0.01831 |
| RSPO4                                   | R-spondin-4                                                     | Q2I0M5           | 8.303  | 8.599  | 0.568 | 0.696 | -0.295 | 0.00443 | 0.02023 |
| Chymase                                 | Chymase                                                         | P23946           | 9.038  | 9.331  | 0.504 | 0.534 | -0.293 | 0.00000 | 0.00051 |
| P-Selectin                              | P-selectin                                                      | P16109           | 13.931 | 14.222 | 0.386 | 0.494 | -0.291 | 0.00024 | 0.00323 |
| prostatic<br>binding<br>protein         | Phosphatidyletha<br>nolamine-binding<br>protein 1               | P30086           | 11.882 | 12.169 | 0.620 | 0.623 | -0.287 | 0.00117 | 0.00831 |
| CK2-A2:B                                | Casein kinase II<br>2-alpha':2-beta<br>heterotetramer           | P19784<br>P67870 | 8.230  | 8.515  | 0.826 | 0.786 | -0.285 | 0.01109 | 0.03939 |
| EPI                                     | Epiregulin                                                      | O14944           | 9.922  | 10.206 | 0.507 | 0.771 | -0.285 | 0.00139 | 0.00931 |
| EDAR                                    | Tumor necrosis<br>factor receptor<br>superfamily<br>member EDAR | Q9UNE0           | 9.441  | 9.725  | 0.495 | 0.597 | -0.284 | 0.00107 | 0.00782 |
| Protein<br>disulfide<br>isomerase<br>A3 | Protein disulfide-<br>isomerase A3                              | P30101           | 11.786 | 12.069 | 0.526 | 0.665 | -0.283 | 0.00397 | 0.01859 |
| hnRNP A/B                               | Heterogeneous<br>nuclear<br>ribonucleoprotein<br>A/B            | Q99729           | 9.743  | 10.026 | 1.347 | 1.037 | -0.283 | 0.00441 | 0.02023 |
| IL-8                                    | Interleukin-8                                                   | P10145           | 9.214  | 9.495  | 0.595 | 0.639 | -0.281 | 0.00060 | 0.00528 |
| Ubiquitin+1                             | Ubiquitin+1,<br>truncated<br>mutation for UbB                   | P62979           | 11.001 | 11.280 | 0.792 | 0.664 | -0.279 | 0.00165 | 0.01020 |
| PDE11                                   | Dual 3',5'-cyclic-<br>AMP and -GMP<br>phosphodiesteras<br>e 11A | Q9HCR9           | 9.909  | 10.184 | 0.563 | 0.817 | -0.275 | 0.01224 | 0.04276 |
| ANP                                     | Atrial natriuretic<br>factor                                    | P01160           | 9.513  | 9.787  | 0.507 | 0.546 | -0.274 | 0.00042 | 0.00419 |

|                         |                                                 |        |        |        |       |       |        |         |         |
|-------------------------|-------------------------------------------------|--------|--------|--------|-------|-------|--------|---------|---------|
| CDC37                   | Hsp90 co-chaperone Cdc37                        | Q16543 | 8.019  | 8.291  | 0.419 | 0.558 | -0.272 | 0.00041 | 0.00419 |
| PKC-Z                   | Protein kinase C zeta type                      | Q05513 | 9.470  | 9.740  | 0.651 | 0.597 | -0.270 | 0.00007 | 0.00185 |
| FGF7                    | Fibroblast growth factor 7                      | P21781 | 10.313 | 10.582 | 0.438 | 0.370 | -0.269 | 0.00000 | 0.00006 |
| Protease nexin I        | Glia-derived nexin                              | P07093 | 10.406 | 10.674 | 0.645 | 0.637 | -0.268 | 0.00599 | 0.02481 |
| Cytochrome P450 3A4     | Cytochrome P450 3A4                             | P08684 | 13.752 | 14.019 | 0.507 | 0.611 | -0.268 | 0.00484 | 0.02155 |
| ASM3A                   | Acid sphingomyelinase-like phosphodiesterase 3a | Q92484 | 12.345 | 12.611 | 0.486 | 0.528 | -0.266 | 0.00014 | 0.00248 |
| MDHC                    | Malate dehydrogenase, cytoplasmic               | P40925 | 14.107 | 14.373 | 0.589 | 0.574 | -0.266 | 0.00292 | 0.01485 |
| NUDC3                   | NudC domain-containing protein 3                | Q8IVD9 | 8.130  | 8.395  | 0.501 | 0.728 | -0.265 | 0.00038 | 0.00407 |
| IDE                     | Insulin-degrading enzyme                        | P14735 | 10.397 | 10.662 | 0.489 | 0.485 | -0.264 | 0.00047 | 0.00459 |
| Dkk-4                   | Dickkopf-related protein 4                      | Q9UBT3 | 12.428 | 12.691 | 0.580 | 0.625 | -0.264 | 0.00322 | 0.01597 |
| UFM1                    | Ubiquitin-fold modifier 1                       | P61960 | 10.452 | 10.712 | 0.649 | 0.610 | -0.259 | 0.00829 | 0.03222 |
| Gro-a                   | Growth-regulated alpha protein                  | P09341 | 10.999 | 11.257 | 0.629 | 0.545 | -0.258 | 0.00036 | 0.00400 |
| PSD7                    | 26S proteasome non-ATPase regulatory subunit 7  | P51665 | 8.497  | 8.754  | 0.444 | 0.371 | -0.257 | 0.00001 | 0.00055 |
| RSK-like protein kinase | Ribosomal protein S6 kinase alpha-5             | O75582 | 7.249  | 7.506  | 0.506 | 0.595 | -0.256 | 0.00138 | 0.00930 |

|                                |                                                                        |                      |        |        |       |       |        |         |         |
|--------------------------------|------------------------------------------------------------------------|----------------------|--------|--------|-------|-------|--------|---------|---------|
| Bcl-2                          | Apoptosis regulator Bcl-2                                              | P10415               | 10.013 | 10.267 | 0.789 | 0.514 | -0.254 | 0.00010 | 0.00213 |
| MAPK5                          | MAP kinase-activated protein kinase 5                                  | Q8IW41               | 8.749  | 9.000  | 0.437 | 0.553 | -0.251 | 0.00085 | 0.00663 |
| Calpastatin                    | Calpastatin                                                            | P20810               | 13.891 | 13.637 | 0.487 | 0.468 | 0.253  | 0.00013 | 0.00248 |
| CD97                           | CD97 antigen                                                           | P48960               | 9.758  | 9.504  | 0.441 | 0.328 | 0.254  | 0.00016 | 0.00269 |
| IL-22BP                        | Interleukin-22 receptor subunit alpha-2                                | Q969J5               | 11.042 | 10.788 | 0.664 | 0.538 | 0.254  | 0.00148 | 0.00961 |
| WFKN1                          | WAP, kazal, immunoglobulin, kunitz and NTR domain-containing protein 1 | Q96NZ8               | 9.305  | 9.050  | 0.424 | 0.402 | 0.255  | 0.00030 | 0.00363 |
| C8                             | Complement component C8                                                | P07357,P07358,P07360 | 10.578 | 10.322 | 0.447 | 0.421 | 0.256  | 0.00032 | 0.00379 |
| ATS13                          | A disintegrin and metalloproteinase with thrombospondin motifs 13      | Q76LX8               | 11.806 | 11.546 | 0.469 | 0.500 | 0.259  | 0.00089 | 0.00675 |
| Cathepsin V                    | Cathepsin L2                                                           | O60911               | 10.427 | 10.166 | 0.530 | 0.596 | 0.261  | 0.00048 | 0.00459 |
| SOST                           | Sclerostin                                                             | Q9BQB4               | 12.975 | 12.709 | 0.611 | 0.578 | 0.266  | 0.00283 | 0.01455 |
| GRB2-related adapter protein 2 | GRB2-related adapter protein 2                                         | O75791               | 9.739  | 9.472  | 0.771 | 0.431 | 0.267  | 0.00056 | 0.00505 |
| RNF43                          | E3 ubiquitin-protein ligase RNF43                                      | Q68DV7               | 10.273 | 10.003 | 0.711 | 0.314 | 0.270  | 0.00006 | 0.00168 |
| Kallikrein 7                   | Kallikrein-7                                                           | P49862               | 10.465 | 10.193 | 0.562 | 0.583 | 0.272  | 0.00419 | 0.01945 |
| Ephrin-A3                      | Ephrin-A3                                                              | P52797               | 10.855 | 10.582 | 0.558 | 0.387 | 0.273  | 0.00024 | 0.00325 |
| Lymphotoxin                    | Tumor necrosis                                                         | P36941               | 11.315 | 11.040 | 0.607 | 0.441 | 0.275  | 0.00206 | 0.01171 |

|                             |                                                                |                  |        |        |       |       |       |         |         |
|-----------------------------|----------------------------------------------------------------|------------------|--------|--------|-------|-------|-------|---------|---------|
| b R                         | factor receptor<br>superfamily<br>member 3                     |                  |        |        |       |       |       |         |         |
| Angiostatin                 | Angiostatin                                                    | P00747           | 14.576 | 14.294 | 0.394 | 0.402 | 0.282 | 0.00002 | 0.00072 |
| Tropomyosin<br>2            | Tropomyosin<br>beta chain                                      | P07951           | 9.453  | 9.162  | 0.645 | 0.507 | 0.292 | 0.00393 | 0.01847 |
| F107B                       | Protein<br>FAM107B                                             | Q9H098           | 9.922  | 9.629  | 0.440 | 0.326 | 0.293 | 0.00001 | 0.00055 |
| IL-17 RC                    | Interleukin-17<br>receptor C                                   | Q8NAC3           | 11.038 | 10.730 | 0.852 | 1.013 | 0.308 | 0.00188 | 0.01110 |
| FN1.4                       | Fibronectin<br>Fragment 4                                      | P02751           | 16.854 | 16.542 | 0.450 | 0.421 | 0.312 | 0.00001 | 0.00067 |
| FN1.3                       | Fibronectin<br>Fragment 3                                      | P02751           | 12.353 | 12.038 | 0.697 | 0.573 | 0.315 | 0.00320 | 0.01595 |
| Myoglobin                   | Myoglobin                                                      | P02144           | 11.372 | 11.045 | 0.526 | 0.580 | 0.327 | 0.00014 | 0.00248 |
| ApoM                        | Apolipoprotein M                                               | O95445           | 13.046 | 12.706 | 0.534 | 0.696 | 0.340 | 0.00054 | 0.00490 |
| Cathepsin S                 | Cathepsin S                                                    | P25774           | 9.906  | 9.566  | 0.376 | 0.340 | 0.341 | 0.00000 | 0.00000 |
| Carbonic<br>Anhydrase<br>IV | Carbonic<br>anhydrase 4                                        | P22748           | 9.707  | 9.365  | 0.534 | 0.408 | 0.342 | 0.00003 | 0.00101 |
| RAD51                       | DNA repair<br>protein RAD51<br>homolog 1                       | Q06609           | 10.584 | 10.231 | 0.513 | 0.573 | 0.353 | 0.00001 | 0.00055 |
| OPG                         | Tumor necrosis<br>factor receptor<br>superfamily<br>member 11B | O00300           | 12.251 | 11.894 | 0.788 | 0.573 | 0.358 | 0.00238 | 0.01289 |
| Fibronectin                 | Fibronectin                                                    | P02751           | 14.963 | 14.587 | 0.813 | 0.700 | 0.376 | 0.00158 | 0.01004 |
| NXPH1                       | Neurexophilin-1                                                | P58417           | 14.440 | 14.054 | 0.609 | 0.382 | 0.385 | 0.00001 | 0.00055 |
| ASAH2                       | Neutral<br>ceramidase                                          | Q9NR71           | 11.768 | 11.356 | 0.896 | 0.894 | 0.413 | 0.00049 | 0.00463 |
| Thrombin                    | Thrombin                                                       | P00734           | 11.818 | 11.392 | 1.231 | 1.422 | 0.425 | 0.00995 | 0.03662 |
| Ferritin                    | Ferritin                                                       | P02794<br>P02792 | 14.457 | 13.990 | 1.167 | 1.159 | 0.467 | 0.01115 | 0.03947 |
| Leptin                      | Leptin                                                         | P41159           | 12.338 | 11.850 | 1.194 | 1.019 | 0.488 | 0.00879 | 0.03375 |

|        |                                         |        |        |        |       |       |       |         |         |
|--------|-----------------------------------------|--------|--------|--------|-------|-------|-------|---------|---------|
| Chk2   | Serine/threonine-protein kinase Chk2    | O96017 | 8.052  | 7.540  | 1.390 | 0.777 | 0.513 | 0.00990 | 0.03662 |
| C6     | Complement component C6                 | P13671 | 14.340 | 13.805 | 1.169 | 0.806 | 0.534 | 0.00441 | 0.02023 |
| SORC2  | VPS10 domain-containing receptor SorCS2 | Q96PQ0 | 9.610  | 9.070  | 1.347 | 0.938 | 0.539 | 0.00156 | 0.00997 |
| PTK6   | Protein-tyrosine kinase 6               | Q13882 | 10.046 | 9.476  | 0.652 | 0.818 | 0.570 | 0.00000 | 0.00051 |
| C3b    | Complement C3b                          | P01024 | 17.183 | 16.518 | 0.591 | 0.701 | 0.665 | 0.00000 | 0.00000 |
| LEAP-1 | Hepcidin                                | P81172 | 13.472 | 12.755 | 1.177 | 1.709 | 0.717 | 0.00896 | 0.03421 |

\*Protein symbol, full protein name and UniProt ID are provided from the UniProtKB database (<https://www.uniprot.org>). Data were log<sub>2</sub> transformed. Mann-Whitney-Wilcoxon tests were performed and adjusted for multiple testing using the Benjamini-Hochberg False Discovery Rate (FDR)-controlling procedure.

**Supplementary Table S2 online.** Public knowledge resources accessed through EdgeBox and integrated in the INCA molecular interaction network model.

| <b>Resource</b>      | <b>Version</b> | <b>URL</b>                                                                                      | <b>Type</b><br><b>N=nodes, E=edges</b> |
|----------------------|----------------|-------------------------------------------------------------------------------------------------|----------------------------------------|
| <b>ChEBI</b>         | v140           | <a href="https://www.ebi.ac.uk/chebi">https://www.ebi.ac.uk/chebi</a>                           | N                                      |
| <b>ChEMBL</b>        | v21            | <a href="https://www.ebi.ac.uk/chembl">https://www.ebi.ac.uk/chembl</a>                         | E                                      |
| <b>ENCODE</b>        | 2012-09-06     | <a href="http://encodenets.gersteinlab.org">http://encodenets.gersteinlab.org</a>               | E                                      |
| <b>Ensembl Genes</b> | Release 84     | <a href="http://www.ensembl.org">http://www.ensembl.org</a>                                     | N                                      |
| <b>Microcosm</b>     | v5             | <a href="http://ebi.ac.uk/enright-srv/microcosm">http://ebi.ac.uk/enright-srv/microcosm</a>     | E                                      |
| <b>miRBase</b>       | v21            | <a href="http://mirbase.org">http://mirbase.org</a>                                             | N                                      |
| <b>miRecords</b>     | v4             | <a href="http://c1 accurascience.com/miRecords">http://c1 accurascience.com/miRecords</a>       | E                                      |
| <b>miRTarBase</b>    | v6.1           | <a href="http://mirtarbase.mbc.nctu.edu.tw">http://mirtarbase.mbc.nctu.edu.tw</a>               | E                                      |
| <b>Reactome</b>      | v56            | <a href="http://www.reactome.org">http://www.reactome.org</a>                                   | E                                      |
| <b>STRING</b>        | v10.0          | <a href="http://string-db.org">http://string-db.org</a>                                         | E                                      |
| <b>STITCH</b>        | v4.0           | <a href="http://stitch.embl.de">http://stitch.embl.de</a>                                       | E                                      |
| <b>TFe</b>           | 2016-06-09     | <a href="http://www.cisreg.ca/cgi-bin/tfe/home.pl">http://www.cisreg.ca/cgi-bin/tfe/home.pl</a> | E                                      |
| <b>WikiPathways</b>  | 2016-06-09     | <a href="http://www.wikipathways.org">http://www.wikipathways.org</a>                           | E                                      |

ChEBI : Chemical Entities of Biological Interest, ChEMBL : Chemical European Molecular Biology Laboratory, ENCODE : Encyclopedia of DNA Elements, STRING : *Search Tool for the Retrieval of Interacting Genes/Proteins*, TFe : transcription factor encyclopedia

**Supplementary Table S3 online.** Number of edges per edge type in the INCA network model.

| Edge type                | Number of edges with type |
|--------------------------|---------------------------|
| in_neighbouring_reaction | 4956                      |
| interacts_with           | 4507                      |
| mirna_targets            | 4306                      |
| in_same_reaction         | 3388                      |
| in_same_component        | 1749                      |
| catalyzes                | 1051                      |
| regulates_transcription  | 1043                      |
| binding                  | 1003                      |
| catalysis                | 363                       |
| reaction                 | 250                       |
| in_group                 | 232                       |
| inhibition               | 88                        |
| inhibits                 | 87                        |
| activation               | 51                        |
| correlates_positive      | 46                        |
| expression               | 13                        |
| mediates_interaction     | 13                        |
| modifies_protein         | 10                        |
| activates_transcription  | 2                         |
| drug_targets             | 1                         |



**Supplementary Table S4 online.** List of the identified clusters in the INCA network model.

| Cluster number | Nodes | Edges | INCA variables *                                                                                                               | Top pathways †                                                                                                                                                                       |
|----------------|-------|-------|--------------------------------------------------------------------------------------------------------------------------------|--------------------------------------------------------------------------------------------------------------------------------------------------------------------------------------|
| 1              | 203   | 787   | BTK, CAPN1, CAPNS1, CAST, <i>CRK</i> , CSK, FN1, GRAP2, LYN, PAK6, PRKCA, PRKCB, PRKC1, PRKCZ, <i>RAC1</i> , <i>SRC</i> , YES1 | Immune response activating cell surface receptor signaling pathway; Fc receptor mediated stimulatory signaling pathway; Fc gamma receptor signaling pathway involved in phagocytosis |
| 2              | 190   | 625   | BAD, GSK3A, GSK3B, <i>HSP90AA1</i> , PRKACA, SFN, YWHAE, YWHAG, YWHAH, YWHAQ, <i>YWHAZ</i>                                     | Anchoring of the basal body to the plasma membrane; AURKA Activation by TPX2; Regulation of PLK1 Activity at G2/M Transition                                                         |
| 3              | 140   | 1020  | ADRBK1, APP, <b>C3</b> , CCL5, CXCL1, CXCL11, CXCL2, CXCL3, CXCL6, CXCL8, F2, PF4, PPBP                                        | Class A/1 (Rhodopsin-like receptors); G alpha (i) signalling events; GPCR ligand binding                                                                                             |
| 4              | 128   | 981   | CDC37, EREG, FGF16, FGF6, FGF7, FGF8, IL2RG, IL3RA, PDGFA, PDGFB, THPO, YWHAB                                                  | activation of MAPKK activity; insulin receptor signaling pathway; fibroblast growth factor receptor signaling pathway                                                                |
| 5              | 141   | 344   | CHEK2, <i>MAPK14</i> , MAPK8, MAPKAPK2, RAN, UBE2N                                                                             | PRC2 methylates histones and DNA; DNA methylation; Meiotic recombination                                                                                                             |
| 6              | 109   | 209   | AKR7A2, HMGB1, HSPD1, <b>MAPKAPK5</b> , SORCS2                                                                                 | MyD88 deficiency (TLR2/4); IRAK4 deficiency (TLR2/4); Diseases of Immune System                                                                                                      |

|    |     |     |                                                                                    |                                                                                                                                                                                     |
|----|-----|-----|------------------------------------------------------------------------------------|-------------------------------------------------------------------------------------------------------------------------------------------------------------------------------------|
| 7  | 116 | 334 | EEF1B2, EIF4H, N6AMT1, RPS3A, RPS7                                                 | Translation; Eukaryotic Translation Initiation; Cap-dependent Translation Initiation                                                                                                |
| 8  | 71  | 177 | APOM, CLIC1, CTSA, GP6, HAMP, KLK7, KPNB1, MB, RBM39, SBDS, SERPINE2, SGTA, UBE2L3 | positive regulation of DNA templated transcription, initiation; regulation of DNA-templated transcription, initiation                                                               |
| 9  | 92  | 214 | <b>CTSS</b> , PSMA6, PSMD7, <i>RPS27A</i>                                          | APC/C-mediated degradation of cell cycle proteins; Regulation of mitotic cell cycle; anaphase-promoting complex-dependent proteasomal ubiquitin-dependent Protein catabolic process |
| 10 | 102 | 199 | GDI2, RAC3, <i>VAV1</i>                                                            | Rho GTPase cycle; Signaling by Rho GTPases; regulation of small GTPase mediated signal transduction                                                                                 |
| 11 | 82  | 115 | IL17RC, <i>STAT1</i> , STAT3                                                       | regulation of tyrosine phosphorylation of Stat1 protein; positive regulation of JAK-STAT cascade; JAKSTAT cascade                                                                   |
| 12 | 64  | 107 | SMAD2, SMAD3                                                                       | transmembrane receptor protein serine/threonine kinase signaling pathway; response to transforming growth factor beta; Signaling by TGF-beta Receptor Complex                       |

|    |    |     |                                                                      |                                                                                                                                            |
|----|----|-----|----------------------------------------------------------------------|--------------------------------------------------------------------------------------------------------------------------------------------|
| 13 | 51 | 95  | CMA1, DHH, JAM3, <b>MMP1</b> ,<br><b>MMP7</b> , PLG, SELP, TNFRSF11B | Extracellular matrix organization; extracellular matrix organization; extracellular structure organization                                 |
| 14 | 61 | 96  | RPS6KA3, RPS6KA5                                                     | stress-activated protein kinase signaling cascade; stress-activated MAPK cascade; Recycling pathway of L1                                  |
| 15 | 52 | 111 | CAMKK1, PRKAA2, PRKAB2, PRKAG1                                       | PKB-mediated events; mTOR signalling; Energy dependent regulation of mTOR by LKB1-AMPK                                                     |
| 16 | 67 | 101 | ISG15, PPIE, SSRP1                                                   | Dual incision in TC-NER; Gap-filling DNA repair synthesis and ligation in TCNER; Transcription-Coupled Nucleotide Excision Repair (TC-NER) |
| 17 | 61 | 74  | ING1, RAD51                                                          | double-strand break repair via homologous recombination; recombinational repair; Homology Directed Repair                                  |
| 18 | 49 | 86  | CSNK2A1, CSNK2A2, CSNK2B, SPHK1                                      | Chaperonin-mediated protein folding; Protein folding; Association of TriC/CCT with target proteins during biosynthesis                     |
| 19 | 53 | 70  | NME1-NME2, PTK6, THBS1                                               |                                                                                                                                            |

|    |    |    |                                    |                                                                                                                                                                                                |
|----|----|----|------------------------------------|------------------------------------------------------------------------------------------------------------------------------------------------------------------------------------------------|
| 20 | 53 | 93 | ADIPOQ, LEP                        | Transcriptional regulation of white adipocyte differentiation; PPARA activates gene expression; Regulation of lipid metabolism by Peroxisome proliferator-activated receptor alpha (PPARalpha) |
| 21 | 49 | 72 | EFNA3, HNRNPAB, PKM                |                                                                                                                                                                                                |
| 22 | 46 | 56 | CASP3, EIF4G2                      | Apoptosis; Programmed Cell Death; Apoptotic execution phase                                                                                                                                    |
| 23 | 40 | 52 | BCL2, BCL2L1, NMT1                 | Intrinsic Pathway for Apoptosis; Apoptosis; Programmed Cell Death                                                                                                                              |
| 24 | 49 | 57 | DDX19B, IDE                        |                                                                                                                                                                                                |
| 25 | 41 | 75 | AREG, FTH1, FTL, NAPA              | Golgi vesicle transport; trans-Golgi Network Vesicle Budding; Clathrin derived vesicle budding                                                                                                 |
| 26 | 41 | 49 | TPM2, TPM4                         | Striated Muscle Contraction; muscle filament sliding; actinmyosin filament sliding                                                                                                             |
| 27 | 33 | 75 | ADAMTS13, C6, C8A, C8B, C8G        | Complement cascade; complement activation; Regulation of Complement cascade                                                                                                                    |
| 28 | 26 | 45 | HSD17B10, IMPDH1, LDHB, MDH1, PPA1 |                                                                                                                                                                                                |

|    |    |    |                                          |                                                                                                                                                                                                                     |
|----|----|----|------------------------------------------|---------------------------------------------------------------------------------------------------------------------------------------------------------------------------------------------------------------------|
| 29 | 39 | 45 | NUDCD3, UFM1                             |                                                                                                                                                                                                                     |
| 30 | 28 | 33 | HSP90AB1, STUB1                          | response to unfolded protein;<br>Cellular response to heat stress;<br>Regulation of HSF1-mediated<br>heat shock response                                                                                            |
| 31 | 23 | 26 | PDE11A, PDE5A                            | Nitric oxide stimulates<br>guanylate cyclase; cGMP<br>metabolic process; Platelet<br>homeostasis                                                                                                                    |
| 33 | 26 | 28 | EDAR, TPI1                               |                                                                                                                                                                                                                     |
| 37 | 21 | 23 | PA2G4, PDIA3                             | Antigen Presentation: Folding,<br>assembly and peptide loading<br>of class I MHC; ER-Phagosome<br>pathway; antigen processing<br>and presentation of exogenous<br>peptide antigen via MHC class<br>I, TAP-dependent |
| 40 | 16 | 29 | DKK1, KREMEN2, SOST                      | regulation of canonical Wnt<br>signaling pathway; canonical<br>Wnt signaling pathway;<br>regulation of Wnt signaling<br>pathway                                                                                     |
| 42 | 11 | 15 | OLFM4, RNF43, RSPO4,<br>SMPDL3A, WFIKKN1 | Regulation of FZD by<br>ubiquitination; Budding and<br>maturation of HIV<br>virion; Membrane binding and<br>targetting of GAG proteins                                                                              |
| 44 | 17 | 29 | CA13, CA4                                | Pyruvate metabolism and Citric<br>Acid (TCA) cycle; The citric                                                                                                                                                      |

|             |     |     |                                                                                                                                                                                                                                                     |                                                                               |
|-------------|-----|-----|-----------------------------------------------------------------------------------------------------------------------------------------------------------------------------------------------------------------------------------------------------|-------------------------------------------------------------------------------|
|             |     |     |                                                                                                                                                                                                                                                     | acid (TCA) cycle and respiratory electron transport; tricarboxylic acid cycle |
| 48          | 17  | 20  | METAP1, METAP2                                                                                                                                                                                                                                      |                                                                               |
| 50          | 13  | 15  | PRDX1, PRDX6                                                                                                                                                                                                                                        | Detoxification of ReactiveOxygen Species                                      |
| 51          | 14  | 18  | NPPA, SNCA                                                                                                                                                                                                                                          | Amyloid fiber formation                                                       |
| 56          | 13  | 17  | ENO1, ENO2                                                                                                                                                                                                                                          | Gluconeogenesis; Glucose metabolism; Gluconeogenesis                          |
| unclustered | 431 | 503 | ACP1, ADGRE5, AK1, ARID3A, ASAH2, CPNE1, CTSV, CYP3A4, DKK4, EIF5A, EPB41, ESD, <b>FAM107B</b> , FER, FLT3, HIST1H1C, IL22RA2, LTBR, MDK, NACA, NSFL1C, NXPH1, PDXP, PEBP1, PPID, PPIF, SEZ6L2, SFRP1, SFTPD, SNX4, STIP1, TKT, TPT1, VTA1, XPNPEP1 |                                                                               |

\*INCA variables in bold indicate the 6 proteins identified to discriminate between HF patients who died or alive after 3 years follow-up; INCA variables in italic indicate the top 10 nodes with the highest betweenness centrality calculated from the INCA network; <sup>#</sup>Information provided by GO (Gene Ontology, <http://geneontology.org/>).

**Supplementary Table S5 online.** List of the proteins in the INCA network linked with the 6 proteins selected by LASSO analysis.

| <b>Protein*</b> | <b>INCA nodes /total linked nodes</b> | <b>Linked INCA nodes (Uniprot ID)/cluster**</b>                              | <b>Fold-change (Case vs. Control, mean <math>\pm</math> SEM)***</b> | <b>P value<sup>‡</sup></b> | <b>GO associated terms<sup>‡</sup></b>                                                                                                                                                                                       |
|-----------------|---------------------------------------|------------------------------------------------------------------------------|---------------------------------------------------------------------|----------------------------|------------------------------------------------------------------------------------------------------------------------------------------------------------------------------------------------------------------------------|
| <b>CTAS</b>     | 1/91                                  | CATL2<br>Cathepsin L2<br>(O60911)/-                                          | 0.79<br>(1155 $\pm$ 377.1 vs 1467 $\pm$ 510.5)                      | 5.31 $10^{-5}$             | -                                                                                                                                                                                                                            |
| <b>MAPK5</b>    | 2/114                                 | KAPCA<br>cAMP-dependent protein kinase catalytic subunit alpha<br>(P17612)/2 | 1.79<br>(10809 $\pm$ 8410 vs 6032 $\pm$ 4931)                       | 2.07 $10^{-4}$             | Anchoring of the basal body to the plasma membrane; AURKA Activation by TPX2; Regulation of PLK1 Activity at G2/M Transition; Loss of Nlp from mitotic centrosomes; Recruitment of mitotic centrosome proteins and complexes |
|                 |                                       | MK14<br>Mitogen-activated protein kinase 14<br>(Q16539)/5                    | 1.31<br>(1472 $\pm$ 763.1 vs 1127 $\pm$ 576.1)                      | 0.0024                     | PRC2 methylates histones and DNA; DNA methylation; Meiotic recombination; DNA methylation on cytosine; SIRT1 negatively regulates rRNA Expression                                                                            |
| <b>C3</b>       | 12/229                                | PLF4<br>Platelet factor 4<br>(P02776)/3                                      | 2.14<br>(85972 $\pm$ 63555 vs 40163 $\pm$ 34472)                    | 4.32 $10^{-6}$             |                                                                                                                                                                                                                              |
|                 |                                       | CXCL3<br>C-X-C motif chemokine 3<br>(P19876)/3                               | 1.40<br>(404.2 $\pm$ 179.6 vs 288,1 $\pm$ 134.8)                    | 8.25 $10^{-6}$             |                                                                                                                                                                                                                              |
|                 |                                       | CXCL7<br>Platelet basic protein<br>(P02775)/3                                | 1.60<br>(11124 $\pm$ 7332 vs 6967 $\pm$ 5033)                       | 1.71 $10^{-4}$             |                                                                                                                                                                                                                              |
|                 |                                       | CXCL1<br>Growth-regulated alpha                                              | 1.22<br>(2466 $\pm$ 761.9 vs 2017 $\pm$ 653.9)                      | 6.52 $10^{-5}$             |                                                                                                                                                                                                                              |

|                                                                                             |                                          |                       |                                                                                                                                                           |
|---------------------------------------------------------------------------------------------|------------------------------------------|-----------------------|-----------------------------------------------------------------------------------------------------------------------------------------------------------|
| protein<br>(P09341)/3                                                                       |                                          |                       |                                                                                                                                                           |
| CCL5<br>C-C motif chemokine 5<br>(P13501)/3                                                 | 1.56<br>(38821 ± 24401 vs 24812 ± 18433) | 9.03 10 <sup>-5</sup> | Class A/1 (Rhodopsin-like receptors); G alpha (i) signalling events; GPCR ligand binding; Peptide ligand-binding receptors; G alpha (q) signalling events |
| CXCL6<br>C-X-C motif chemokine<br>6<br>(P80162)/3                                           | 1.34<br>(1119 ± 463.4 vs 832.8 ± 428)    | 1.95 10 <sup>-5</sup> |                                                                                                                                                           |
| IL8<br>Interleukin-8 (P10145)/3                                                             | 1.14<br>(676.5 ± 186.3 vs 591.6 ± 193.6) | 0.0012                |                                                                                                                                                           |
| CXCL11<br>C-X-C motif chemokine<br>11 (O14625)/3                                            | 1.18<br>(4157 ± 1683 vs 3537 ± 1365)     | 0.0178                |                                                                                                                                                           |
| SDF1<br>Stromal cell-derived<br>factor 1<br>(P48061)/3                                      | 1.10<br>(3872 ± 822.2 vs 3513 ± 644.8)   | 0.0016                |                                                                                                                                                           |
| APP<br>Amyloid-beta precursor<br>protein<br>(P05067)/3                                      | 1.35<br>(47479 ± 24460 vs 35111 ± 19466) | 0.0011                |                                                                                                                                                           |
| STAT1<br>Signal transducer and<br>activator of transcription<br>1-alpha/beta<br>(P42224)/11 | 1.57<br>(6437 ± 3912 vs 4100 ± 2840)     | 4.64 10 <sup>-5</sup> |                                                                                                                                                           |
| C6<br>Complement component<br>C6                                                            | 0.40<br>(11344 ± 3221 vs 28437 ± 21843)  | 5.61 10 <sup>-6</sup> | Complement cascade; complement activation; Regulation of Complement cascade; regulation of complement activation; complement                              |



|              |      |                                                  |                                          |                       |                                                                                                                                                                                              |
|--------------|------|--------------------------------------------------|------------------------------------------|-----------------------|----------------------------------------------------------------------------------------------------------------------------------------------------------------------------------------------|
|              |      | (P13671)/27                                      |                                          |                       | activation, classical pathway                                                                                                                                                                |
| <b>MMP1</b>  | 4/39 | PLMN<br>Plasminogen<br>(P00747)/13               | 0.83<br>(20606 ± 5462 vs 24685 ± 5986)   | 1.41 10 <sup>-5</sup> | Extracellular matrix organization; extracellular matrix organization; extracellular structure organization; Activation of Matrix Metalloproteinases; Degradation of the extracellular matrix |
|              |      | CMA1<br>Chymase<br>(P23946)/13                   | 1.28<br>(627.5 ± 182.4 vs 490.2 ± 94.76) | 2.40 10 <sup>-8</sup> |                                                                                                                                                                                              |
|              |      | MMP7<br>Matrilysin<br>(P09237)/13                | 1.44<br>(913.1 ± 51.6 vs. 635.1 ± 41.5)  | 0.0011                |                                                                                                                                                                                              |
|              |      | BCL2<br>Apoptosis regulator Bcl-2<br>(P10415)/23 | 1.36<br>(1289 ± 432.8 vs 946.4 ± 283.7)  | 8.69 10 <sup>-8</sup> | Intrinsic Pathway for Apoptosis; Apoptosis; Programmed Cell Death; mitochondrial membrane organization; regulation of mitochondrial membrane permeability                                    |
| <b>MMP7</b>  | 2/36 | MMP1<br>Interstitial collagenase<br>(P03956)/13  | 1.96<br>(1499.6 ± 93.7 vs. 766.4 ± 40.2) | 5.49 10 <sup>-5</sup> | Extracellular matrix organization; extracellular matrix organization; extracellular structure organization; Activation of Matrix Metalloproteinases; Degradation of the extracellular matrix |
|              |      | CATL2<br>Cathepsin L2<br>(O60911)/-              | 0.79<br>(1155 ± 377.1 vs 1467 ± 510.5)   | 5.31 10 <sup>-5</sup> | -                                                                                                                                                                                            |
| <b>F107B</b> | 0/15 | -                                                | -                                        | -                     | -                                                                                                                                                                                            |

\* Selected protein candidates from Table 4; \*\*Full name, protein symbol and UniProt ID are provided from UniProtKB database (<https://www.uniprot.org/>); -, no cluster and information available in the INCA network; \*\*\* Data are expressed in relative fluorescence unit; <sup>#</sup>P value was calculated by Mann-Whitney-Wilcoxon test; <sup>=</sup> Information provided by GO (Gene Ontology, <http://geneontology.org/>).

**Supplementary Table S6 online.** Normalization scale factors

| PlateId | SampleId | SampleGroup | HybControlNormScale | NormScale.40 | NormScale.1 | NormScale.0.005 | RowCheck |
|---------|----------|-------------|---------------------|--------------|-------------|-----------------|----------|
| Set 01  | 341      | Control     | 0.954               | 1.078        | 1.129       | 0.997           | PASS     |
| Set 01  | 123      | Dead        | 0.961               | 0.922        | 1.028       | 0.822           | PASS     |
| Set 01  | 1071     | Control     | 0.895               | 1.381        | 1.305       | 1.105           | PASS     |
| Set 01  | 30       | Dead        | 0.924               | 0.864        | 0.789       | 1.082           | PASS     |
| Set 01  | 284      | Control     | 0.993               | 0.957        | 0.965       | 0.968           | PASS     |
| Set 01  | 96       | Dead        | 0.988               | 0.887        | 0.894       | 1               | PASS     |
| Set 01  | 231      | Control     | 0.953               | 0.549        | 0.734       | 1.006           | PASS     |
| Set 01  | 828      | Control     | 0.951               | 0.875        | 0.778       | 0.818           | PASS     |
| Set 01  | 265      | Control     | 0.904               | 1.156        | 1.049       | 0.978           | PASS     |
| Set 01  | 546      | Control     | 0.98                | 1.12         | 1.057       | 0.915           | PASS     |
| Set 01  | 769      | Control     | 0.909               | 0.598        | 0.637       | 0.848           | PASS     |
| Set 01  | 50       | Dead        | 1.001               | 0.79         | 0.779       | 0.788           | PASS     |
| Set 01  | 294      | Dead        | 0.953               | 0.898        | 1.321       | 1.125           | PASS     |
| Set 01  | 185      | Dead        | 0.996               | 1.001        | 0.866       | 1.006           | PASS     |
| Set 01  | 329      | Control     | 0.95                | 0.86         | 1.004       | 0.936           | PASS     |
| Set 01  | 318      | Dead        | 0.939               | 1.046        | 1.02        | 1.022           | PASS     |
| Set 01  | 545      | Control     | 0.945               | 1.107        | 1.207       | 1.231           | PASS     |
| Set 01  | 963      | Control     | 1.043               | 1.034        | 0.974       | 0.826           | PASS     |
| Set 01  | 704      | Control     | 1.062               | 1.122        | 1.171       | 0.876           | PASS     |
| Set 01  | 130      | Dead        | 0.992               | 1.206        | 1.103       | 0.931           | PASS     |
| Set 01  | 82       | Dead        | 0.931               | 1.154        | 1.084       | 1.253           | PASS     |
| Set 01  | 217      | Dead        | 0.953               | 0.832        | 0.905       | 0.922           | PASS     |
| Set 01  | 782      | Control     | 0.912               | 1.342        | 1.388       | 1.063           | PASS     |
| Set 01  | 247      | Dead        | 0.882               | 0.851        | 0.926       | 1.019           | PASS     |
| Set 01  | 94       | Dead        | 0.905               | 1.095        | 1.071       | 1.051           | PASS     |
| Set 01  | 1008     | Control     | 0.93                | 1.332        | 1.225       | 1.099           | PASS     |
| Set 01  | 772      | Dead        | 0.971               | 1.294        | 1.298       | 1.167           | PASS     |
| Set 01  | 1018     | Dead        | 0.982               | 1.106        | 1.009       | 1.065           | PASS     |
| Set 01  | 59       | Dead        | 0.949               | 0.793        | 0.771       | 0.936           | PASS     |
| Set 01  | 102      | Dead        | 0.976               | 0.857        | 0.833       | 0.993           | PASS     |
| Set 01  | 969      | Control     | 0.916               | 0.701        | 0.714       | 0.705           | PASS     |
| Set 01  | 540      | Control     | 0.961               | 1.394        | 1.271       | 1.097           | PASS     |
| Set 01  | 25       | Dead        | 1.032               | 0.867        | 0.94        | 1.011           | PASS     |
| Set 01  | 384      | Control     | 0.977               | 1.226        | 1.13        | 1.088           | PASS     |

|        |              |       |       |       |            |
|--------|--------------|-------|-------|-------|------------|
| Set 01 | 812 Control  | 0.923 | 0.894 | 0.818 | 0.817 PASS |
| Set 01 | 93 Dead      | 0.942 | 0.913 | 0.919 | 0.912 PASS |
| Set 01 | 656 Control  | 0.912 | 0.955 | 0.938 | 0.969 PASS |
| Set 01 | 331 Dead     | 0.893 | 0.637 | 0.901 | 0.933 PASS |
| Set 01 | 14 Dead      | 0.996 | 1.129 | 0.972 | 0.976 PASS |
| Set 01 | 694 Control  | 0.968 | 0.212 | 0.578 | 0.762 FAIL |
| Set 01 | 201 Dead     | 0.902 | 0.727 | 0.839 | 0.943 PASS |
| Set 01 | 1012 Control | 0.92  | 1.102 | 1.12  | 1.151 PASS |
| Set 01 | 58 Dead      | 1.031 | 0.783 | 0.937 | 0.998 PASS |
| Set 01 | 24 Dead      | 0.99  | 1.336 | 1.167 | 1.142 PASS |
| Set 01 | 234 Dead     | 0.923 | 0.446 | 0.694 | 0.946 PASS |
| Set 01 | 120 Control  | 0.961 | 1.164 | 1.082 | 1.011 PASS |
| Set 01 | 333 Dead     | 1.09  | 0.794 | 0.881 | 0.981 PASS |
| Set 01 | 375 Control  | 0.995 | 1.133 | 0.975 | 0.9 PASS   |
| Set 01 | 378 Dead     | 0.943 | 0.99  | 0.996 | 1.089 PASS |
| Set 01 | 81 Dead      | 1.013 | 1.171 | 1.05  | 1.075 PASS |
| Set 01 | 288 Control  | 0.933 | 1.255 | 1.161 | 1.037 PASS |
| Set 01 | 29 Dead      | 0.915 | 1.098 | 1.018 | 1.05 PASS  |
| Set 01 | 1062 Control | 0.931 | 1.081 | 1.05  | 0.969 PASS |
| Set 01 | 38 Dead      | 1.062 | 0.473 | 0.627 | 0.805 PASS |
| Set 01 | 54 Dead      | 1.01  | 0.467 | 0.68  | 0.818 PASS |
| Set 01 | 357 Control  | 0.951 | 0.925 | 1.082 | 0.943 PASS |
| Set 01 | 516 Control  | 1.073 | 1.444 | 1.521 | 1.177 PASS |
| Set 01 | 503 Control  | 0.993 | 0.917 | 0.977 | 0.89 PASS  |
| Set 01 | 88 Dead      | 1.002 | 0.608 | 0.772 | 0.914 PASS |
| Set 01 | 538 Control  | 1.115 | 1.012 | 1.081 | 1.003 PASS |
| Set 01 | 945 Control  | 1.056 | 1.047 | 0.953 | 0.893 PASS |
| Set 01 | 818 Control  | 1.043 | 1.134 | 1.138 | 1.153 PASS |
| Set 01 | 839 Control  | 1.055 | 1.322 | 1.095 | 1.098 PASS |
| Set 01 | 970 Control  | 1.012 | 1.012 | 1.143 | 0.922 PASS |
| Set 01 | 1219 Control | 0.977 | 1.348 | 1.254 | 1.23 PASS  |
| Set 01 | 118 Dead     | 0.974 | 1.009 | 0.999 | 0.944 PASS |
| Set 01 | 139 Control  | 0.965 | 0.944 | 0.897 | 0.925 PASS |
| Set 01 | 1212 Control | 1.071 | 1.739 | 1.886 | 1.703 PASS |
| Set 01 | 116 Dead     | 1.098 | 1.186 | 1.071 | 1.124 PASS |
| Set 01 | 27 Control   | 1.024 | 0.828 | 0.827 | 0.983 PASS |

|        |              |       |         |       |       |      |
|--------|--------------|-------|---------|-------|-------|------|
| Set 01 | 1047 Dead    | 1.009 | 1.077   | 1.061 | 0.995 | PASS |
| Set 01 | 636 Control  | 0.968 | 1.118   | 1.036 | 1.002 | PASS |
| Set 01 | 267 Control  | 0.951 | 1.298   | 1.307 | 1.152 | PASS |
| Set 01 | 362 Dead     | 0.969 | 1.237   | 1.232 | 1.171 | PASS |
| Set 01 | 396 Dead     | 1.013 | 1.013   | 1.016 | 0.996 | PASS |
| Set 01 | 31 Dead      | 0.98  | 0.753   | 0.74  | 1.001 | PASS |
| Set 01 | 554 Control  | 0.985 | 1.001   | 0.982 | 1.153 | PASS |
| Set 01 | 297 Dead     | 1.111 | 1.166   | 1.145 | 1.016 | PASS |
| Set 01 | 585 Control  | 1.049 | 1.183   | 1.165 | 1.003 | PASS |
| Set 01 | 383 Control  | 1.008 | 1.285   | 1.361 | 1.143 | PASS |
| Set 01 | 48 Dead      | 1.043 | 0.863   | 0.868 | 0.927 | PASS |
| Set 01 | 968 Control  | 1.07  | 1.242   | 1.371 | 1.238 | PASS |
| Set 01 | 84 Dead      | 1.07  | 0.61    | 0.56  | 0.89  | PASS |
| Set 01 | 76 Control   | 1.119 | 0.864   | 0.851 | 1.016 | PASS |
| Set 02 | 1007 Control | 0.978 | 1.028   | 1.084 | 1.225 | PASS |
| Set 02 | 831 Control  | 1.015 | 0.381   | 0.573 | 0.745 | FAIL |
| Set 02 | 861 Control  | 1.031 | 1.35    | 1.498 | 1.054 | PASS |
| Set 02 | 728 Dead     | 0.961 | 1.063   | 1.197 | 0.974 | PASS |
| Set 02 | 566 Control  | 1.066 | 1.357   | 1.222 | 1.046 | PASS |
| Set 02 | 340 Control  | 1.046 | 0.63    | 0.727 | 0.893 | PASS |
| Set 02 | 815 Control  | 1.086 | 0.796   | 0.863 | 0.81  | PASS |
| Set 02 | 422 Dead     | 0.971 | 1.05    | 1.003 | 0.992 | PASS |
| Set 02 | 372 Dead     | 1.009 | 1.255   | 1.121 | 1.289 | PASS |
| Set 02 | 264 Dead     | 1.02  | 0.617   | 0.791 | 1.003 | PASS |
| Set 02 | 583 Control  | 1.063 | 1.185   | 0.946 | 0.812 | PASS |
| Set 02 | 46 Dead      | 0.964 | 1.192   | 1.036 | 1     | PASS |
| Set 02 | 44 Dead      | 1.02  | 1.013   | 0.988 | 0.988 | PASS |
| Set 02 | 486 Control  | 1.02  | 1.306   | 1.236 | 1.1   | PASS |
| Set 02 | 360 Dead     | 0.996 | 1.017   | 0.9   | 0.924 | PASS |
| Set 02 | 136 Dead     | 0.976 | 1.19    | 1.126 | 0.962 | PASS |
| Set 02 | 432 Control  | 1.012 | 0.84    | 0.861 | 1.071 | PASS |
| Set 02 | 150 Dead     | 0.963 | 1.024   | 1.056 | 1.165 | PASS |
| Set 02 | 149 Dead     | 0.982 | 1.035   | 0.99  | 0.913 | PASS |
| Set 02 | 189 Dead     | 0.939 | 1.017   | 1.054 | 1.057 | PASS |
| Set 02 | 778 Control  | 1.019 | 183.002 | 1.116 | 1.412 | FAIL |
| Set 02 | 291 Dead     | 1.023 | 1       | 1.145 | 1.064 | PASS |

|        |             |       |       |       |       |      |
|--------|-------------|-------|-------|-------|-------|------|
| Set 02 | 997 Control | 0.992 | 1.283 | 1.061 | 0.963 | PASS |
| Set 02 | 796 Control | 1.012 | 1.337 | 1.184 | 1.093 | PASS |
| Set 02 | 387 Dead    | 1.035 | 0.825 | 0.796 | 0.836 | PASS |
| Set 02 | 211 Dead    | 1.043 | 0.798 | 0.899 | 0.969 | PASS |
| Set 02 | 374 Control | 1.052 | 1.205 | 1.09  | 1.004 | PASS |
| Set 02 | 66 Dead     | 1.019 | 0.578 | 0.744 | 0.871 | PASS |
| Set 02 | 834 Control | 0.948 | 1.119 | 1.207 | 1.218 | PASS |
| Set 02 | 37 Dead     | 0.943 | 1.116 | 1.015 | 0.974 | PASS |
| Set 02 | 72 Dead     | 0.932 | 0.819 | 0.846 | 1.011 | PASS |
| Set 02 | 346 Control | 1.039 | 1.629 | 1.582 | 1.531 | PASS |
| Set 02 | 154 Dead    | 1.059 | 0.983 | 1.063 | 0.953 | PASS |
| Set 02 | 111 Dead    | 0.977 | 1.093 | 0.998 | 0.893 | PASS |
| Set 02 | 334 Dead    | 0.977 | 1.221 | 1.35  | 1.157 | PASS |
| Set 02 | 274 Control | 1.071 | 0.835 | 0.986 | 0.99  | PASS |
| Set 02 | 737 Control | 1.117 | 1.07  | 1.064 | 1.003 | PASS |
| Set 02 | 108 Dead    | 1.049 | 0.85  | 1.01  | 1.083 | PASS |
| Set 02 | 8 Dead      | 1.091 | 1.005 | 0.972 | 1.045 | PASS |
| Set 02 | 648 Control | 1.1   | 0.098 | 0.298 | 0.619 | FAIL |
| Set 02 | 678 Control | 1.149 | 1.174 | 1.116 | 0.967 | PASS |
| Set 02 | 550 Control | 1.062 | 1.306 | 1.178 | 1.09  | PASS |
| Set 02 | 489 Control | 0.969 | 1.181 | 1.122 | 0.973 | PASS |
| Set 02 | 105 Dead    | 1.05  | 0.812 | 0.897 | 0.908 | PASS |
| Set 02 | 999 Dead    | 1.107 | 0.91  | 0.967 | 0.976 | PASS |
| Set 02 | 17 Dead     | 1.073 | 0.845 | 0.94  | 0.953 | PASS |
| Set 02 | 412 Dead    | 1.047 | 0.937 | 0.976 | 1.045 | PASS |
| Set 02 | 368 Dead    | 1.029 | 1.345 | 1.335 | 1.066 | PASS |
| Set 02 | 2 Dead      | 1.075 | 0.701 | 0.796 | 0.801 | PASS |
| Set 02 | 702 Control | 0.971 | 1.256 | 1.197 | 1.101 | PASS |
| Set 02 | 12 Dead     | 1.001 | 0.794 | 0.768 | 0.922 | PASS |
| Set 02 | 33 Dead     | 0.987 | 0.631 | 0.78  | 0.964 | PASS |
| Set 02 | 292 Dead    | 0.966 | 1.324 | 1.298 | 1.21  | PASS |
| Set 02 | 45 Dead     | 1     | 1.082 | 1.052 | 0.929 | PASS |
| Set 02 | 917 Control | 0.963 | 0.948 | 0.967 | 1.003 | PASS |
| Set 02 | 152 Dead    | 0.983 | 1.184 | 1.135 | 1.215 | PASS |
| Set 02 | 623 Control | 0.953 | 1.298 | 1.016 | 1.04  | PASS |
| Set 02 | 161 Dead    | 0.96  | 0.512 | 0.638 | 0.886 | PASS |

|        |             |       |       |       |       |      |
|--------|-------------|-------|-------|-------|-------|------|
| Set 02 | 214 Dead    | 0.988 | 0.722 | 0.799 | 0.898 | PASS |
| Set 02 | 883 Control | 0.945 | 1.221 | 1.18  | 1.124 | PASS |
| Set 02 | 390 Control | 1.058 | 1.028 | 0.988 | 1.003 | PASS |
| Set 02 | 43 Dead     | 0.981 | 0.51  | 0.627 | 0.891 | PASS |
| Set 02 | 498 Control | 1.009 | 1.41  | 1.356 | 1.205 | PASS |
| Set 02 | 864 Control | 1.026 | 0.976 | 1.005 | 1.007 | PASS |
| Set 02 | 851 Control | 1.017 | 1.07  | 1.095 | 1.093 | PASS |
| Set 02 | 892 Control | 1.035 | 0.987 | 1.126 | 0.975 | PASS |
| Set 02 | 86 Control  | 1.101 | 0.589 | 0.783 | 0.772 | PASS |
| Set 02 | 947 Control | 1.048 | 0.861 | 0.934 | 0.767 | PASS |
| Set 02 | 354 Control | 1.01  | 1.51  | 1.307 | 1.063 | PASS |
| Set 02 | 282 Dead    | 1.064 | 0.933 | 0.859 | 0.92  | PASS |
| Set 02 | 75 Dead     | 1.02  | 1.011 | 0.981 | 1.058 | PASS |
| Set 02 | 293 Dead    | 1.019 | 0.781 | 0.748 | 0.941 | PASS |
| Set 02 | 273 Control | 1.005 | 0.729 | 0.756 | 0.932 | PASS |
| Set 02 | 660 Control | 1.066 | 0.893 | 0.864 | 0.887 | PASS |
| Set 02 | 940 Control | 0.983 | 1.674 | 1.825 | 1.817 | PASS |
| Set 02 | 92 Dead     | 0.98  | 0.875 | 0.993 | 1.03  | PASS |
| Set 02 | 460 Control | 0.971 | 1.181 | 1.17  | 1.052 | PASS |
| Set 02 | 339 Control | 1.08  | 0.998 | 0.929 | 1.123 | PASS |
| Set 02 | 133 Dead    | 1.101 | 0.815 | 0.83  | 0.85  | PASS |
| Set 02 | 552 Control | 1.107 | 1.123 | 1.058 | 1.136 | PASS |
| Set 02 | 53 Dead     | 1.052 | 0.683 | 0.77  | 0.958 | PASS |
| Set 02 | 151 Dead    | 1.196 | 0.981 | 1.01  | 0.937 | PASS |
| Set 02 | 590 Dead    | 1.143 | 1.356 | 1.184 | 1.115 | PASS |
| Set 02 | 781 Control | 1.093 | 1.194 | 1.293 | 1.014 | PASS |

Samples failing the intra-run normalization scael factors are highlited in yellow
